# Supplementary material
Source: Springer Nature journal article supplement (https://www.springermedizin.de/resource/supplementary/12889_2013_6675_MOESM6_ESM.pdf/9498620)
Supplement: MOESM6 [file 9498620]

**Numbers of eligible households at baseline**

326 houses with children aged 7 years or less

285 houses where the householder interviewed

352 carers living in the 285 houses were recruited to the study and baseline data collected. 24 carers excluded because of missing outcome data; 328 carers living in 263 houses included in analysis of baseline data

**Numbers of non-participating eligible households**

31 houses: Main participating householder away on 3 consecutive visits  
10 houses: main householder declined to participate

142 (40%) of carers lost to follow-up

**Study cohort**

Comprises 208 (59%) of carers followed up (2 lost due to incomplete data): living in 181 houses at baseline; 182 at follow-up.

For the 208 carers, 132 (64%) lived in the same house at follow-up as baseline, 156 (75%) had the same householder.

**House infrastructure**

FHLP<sup>a</sup> data

208 (59%) carers: living in 125 (44%) houses at baseline; and 122 (43%) houses at follow-up.

**House infrastructure/Hygiene**

SFS<sup>b</sup> and SCS<sup>c</sup> data

208 (59%) carers: living in 149 (52%) houses at baseline; and 148 (52%) houses at follow-up.
